# Supplementary material for: Flavonoid-Rich Sambucus nigra Berry Extract Enhances Nrf2/HO-1 Signaling Pathway Activation and Exerts Antiulcerative Effects In Vivo
Source: MDPI journal article supplement (doi:10.3390/ijms242015486), 2023-10-23
Supplement: s1 [file s1]

# Supplementary file

## GC-MS Analysis

### Sample Preparation

50 mg of extract was taken into a tube and 1 mL of hexane was added. After 2 minutes of vortexing, the upper phase was filtered with a 0.45  $\mu\text{m}$  PETF filter and transferred to a vial and analyzed in the GC-MS system.

### GC-MS Analysis

The system used in the analysis is Shimadzu QP2010 Ultra Gas Chromatography-Mass Spectroscopy. 60 mx0.25 mmx0.25 $\mu\text{m}$  (Teknokroma-TBR 5MS) film column was used as column. Flow was 1.1 mL / min, injection volume was 1  $\mu\text{L}$  and injection temperature was set at 250  $^{\circ}\text{C}$ . Electron Impact ionization was used as ionizator and the scanning range of the mass analyzer was set as 40-600 m/z. The temperature program applied in the analysis is as **Table 1**.

The chromatogram image (Figure 1) and the results (Table 2) of the analyzed sample are as follows (Compounds with 90% or more similarity in library matching are listed).

## LC-MS/MS analysis

### Sample Preparation

50 mg of sample extract was taken into a tube and 1 mL of water-methanol mixture (50:50) was added. The tube was sonicated for 5 min, and then the solution was filtered through a 0.25  $\mu\text{m}$  PETF filter. The filtered solution was diluted 1:10 with a water-methanol (50:50) mixture and the solution was transferred to a vial for analysis.

### Quantitative analysis of phenolic and flavonoid compounds by LC-MS/MS

The analysis of phenolic and flavonoid content was carried out with Agilent brand 6460 Triple Quad model liquid chromatography- tandem mass spectroscopy. C18 column (250 mm x 4.6 mm, 5 $\mu\text{m}$ ) was used for chromatographic separation. The flow rate was 0.4 mL/min and the injection volume was 10  $\mu\text{L}$ . The column temperature was set to 30 $^{\circ}\text{C}$ . 0.1% (v/v) formic acid solution (A) and methanol (B) were used as the mobile phase. The gradient system used in the analysis is shown in Table S1. A standard chromatogram, Supplementary Fig. 1, was obtained with pure standards, and the amounts of analytes in the sample were determined by creating a calibration curve (Table 2).

**Table S1.** The gradient system used in the analysis.

|   | Time      | A      | B      |
|---|-----------|--------|--------|
| 1 | 3.00 min  | 75.0 % | 25.0 % |
| 2 | 12.00 min | 50.0 % | 50.0 % |
| 3 | 16.00 min | 10.0 % | 90.0 % |
| 4 | 21.00 min | 10.0 % | 90.0 % |
| 5 | 24.00 min | 97.5 % | 25 %   |

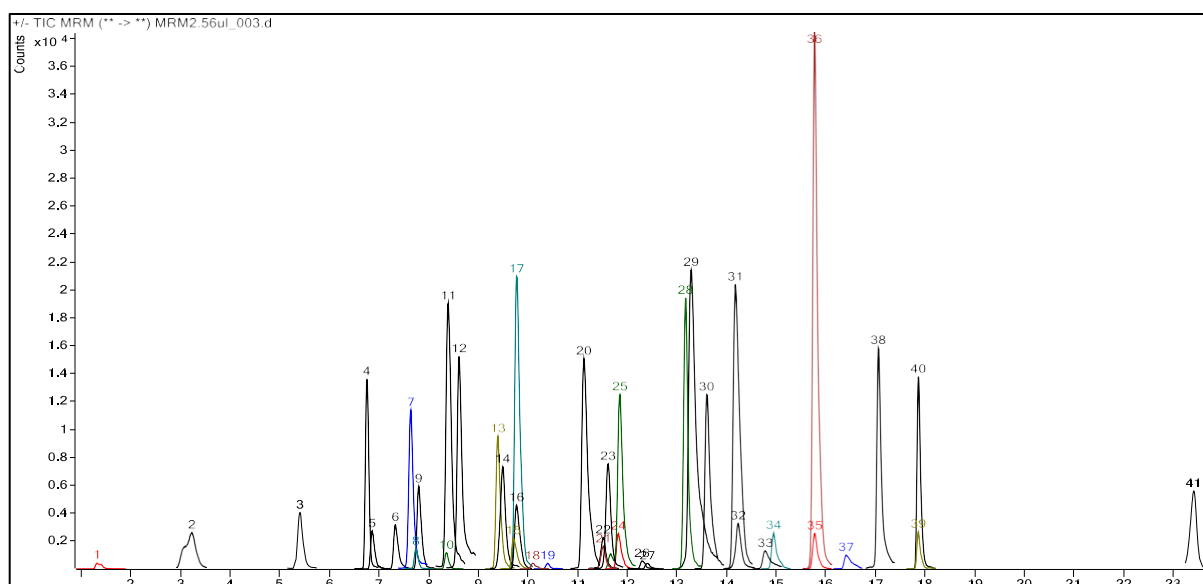

**Supplementary Figure S1.** MRM chromatogram of standard compounds : shikimic acid (1), gallic acid (2), protocatechuic acid (3), chlorogenic acid (4), caffeic acid (5), hydroxybenzaldehyde (6), epigallocatechin (7), catechin (8), o-coumaric acid (9), taxifolin (10), trans-ferulic acid (11), vanillic acid (12), salicylic acid (13), syringic acid (14), vanillin (15), caffeine (16), polydatine (17), resveratrol (18), sinapic acid (19), scutellarin (20), protocatechuic ethyl ester (21), p-coumaric acid (22), coumarin (23), isoquercitrin (24), hesperidin (25), rutin (26), quercetin-3-O-silozid (27), kaempferol-3-glucoside (28), fisetin (29), baicalin (30), chrysin (31), trans-cinnamic acid (32), quercetin (33), naringenin (34), biochanin A (35), morin (36), hesperetin (37), kaempferol (38), baicalein (39), luteolin (40), diosgenin (41).
